# Supplementary material
Source: PubMed Central journal article supplement (PMC3843317)
Supplement: NIHMS517810-supplement-Supplementary_Data.pdf [file NIHMS517810-supplement-Supplementary_Data.pdf]

## Supplementary Information

### Inadequate T follicular cell help impairs B cell immunity during HIV infection

Rafael A. Cubas<sup>1</sup>, Joseph C. Mudd<sup>2</sup>, Anne-Laure Savoye<sup>3</sup>, Matthieu Perreau<sup>3</sup>, Julien van Grevenynghe<sup>1</sup>, Talibah Metcalf<sup>1</sup>, Elizabeth Connick<sup>4</sup>, Amie Meditz<sup>4</sup>, Gordon J. Freeman<sup>5</sup>, Guillermo Abesada-Terk Jr.<sup>6</sup>, Jeffrey M. Jacobson<sup>7</sup>, Ari D. Brooks<sup>8</sup>, Shane Crotty<sup>9,10</sup>, Jacob D. Estes<sup>11</sup>, Giuseppe Pantaleo<sup>3</sup>, Michael M. Lederman<sup>2</sup>, Elias K. Haddad<sup>1</sup>

<sup>1</sup>Vaccine and Gene Therapy Institute of Florida, Port St. Lucie, Florida, USA.

<sup>2</sup>Division of Infectious Diseases, Center for AIDS Research, Case Western Reserve University/University Hospitals, Case Medical Center, Cleveland, Ohio, USA.

<sup>3</sup>Divisions of Immunology and Allergy, Swiss Vaccine Research Institute, Lausanne University Hospital, University of Lausanne, Lausanne, Switzerland.

<sup>4</sup>Division of Infectious Diseases, University of Colorado Denver, Colorado, USA.

<sup>5</sup>Department of Medical Oncology, Dana-Faber Cancer Institute, Harvard Medical School, Boston, Massachusetts, USA.

<sup>6</sup>Robert and Carol Weissman Cancer Center, Martin Memorial Health Systems, Stuart, Florida, USA.

<sup>7</sup>Division of Infectious Diseases and HIV Medicine, Drexel University College of Medicine, Philadelphia, Pennsylvania, USA.

<sup>8</sup>Department of Surgery, Drexel University College of Medicine, Philadelphia, Pennsylvania, USA.

<sup>9</sup>Division of Vaccine Discovery, La Jolla Institute for Allergy and Immunology (LIAI), La Jolla, California, USA.

<sup>10</sup>Center for HIV/AIDS Vaccine Immunology and Immunogen Discovery (CHAVI-ID)

<sup>11</sup>The AIDS and Cancer Virus Program, SAIC-Frederick, National Cancer Institute, NIH, Frederick, Maryland, USA.

Supplementary Table 1 Sample data from uninfected and HIV-infected subjects

| <b>HIV-</b>    |            | <b>HIV+</b>    |            |                                                |                                   |
|----------------|------------|----------------|------------|------------------------------------------------|-----------------------------------|
| <b>ID</b>      | <b>Age</b> | <b>ID</b>      | <b>Age</b> | <b>CD4 Count<br/>(cells/<math>\mu</math>l)</b> | <b>Viral Load<br/>(copies/ml)</b> |
| LN048          | 71         | LNB-4          | 39         | 606                                            | 4862                              |
| LN055          | 57         | LNB-6          | 43         | 386                                            | 6050                              |
| LN056          | 43         | LNB-7          | 47         | 429                                            | 5791                              |
| LN061          | 46         | LNB-10         | 29         | 389                                            | 17960                             |
| LN062          | 46         | LNB-11         | 32         | 650                                            | 6640                              |
| LN063          | 56         | P4133          | 24         | 762                                            | 2745                              |
| LN065          | 41         | P3925          | 39         | 465                                            | 52855                             |
| LN066          | 26         | AVIB1024       | 45         | 709                                            | 46318                             |
| LN068          | 68         | AVIB1014       | 43         | 788                                            | 416096                            |
| LN071          | 54         | CNA2108        | 76         | 1074                                           | 216700                            |
| LN073          | 74         | P3194          | 54         | 866                                            | 4733                              |
| <b>Average</b> | <b>53</b>  | <b>Average</b> | <b>43</b>  | <b>648</b>                                     | <b>70977</b>                      |

Supplementary Fig. 1 Tfh cells are enriched in the CD4<sup>+</sup>CXCR5<sup>hi</sup> T cell population

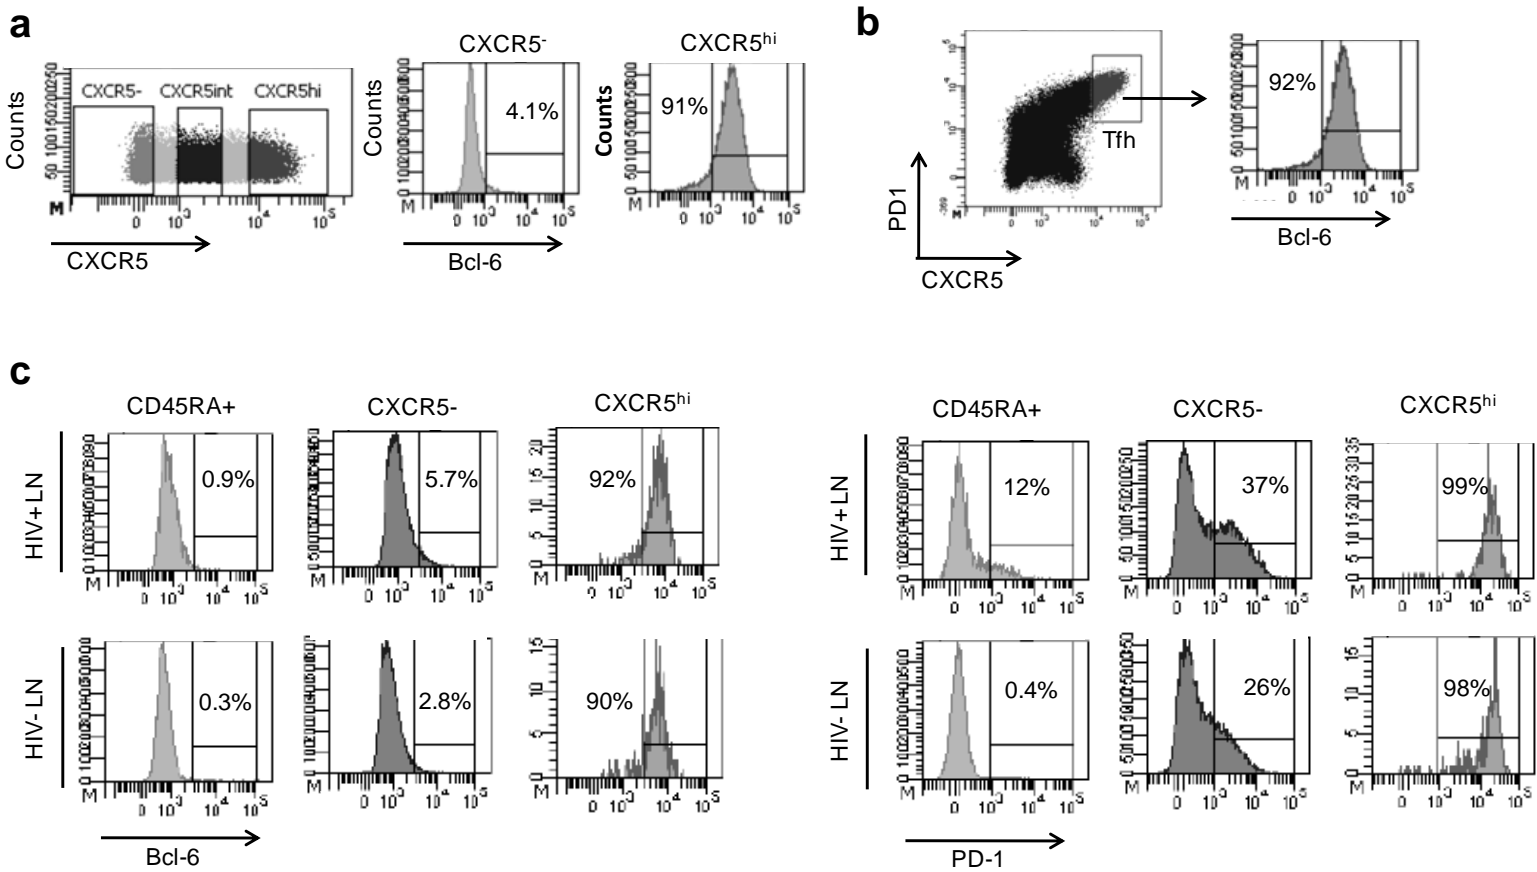

(a) The dot plot depicts the distribution of CXCR5 and Bcl-6 expression on Vivid<sup>-</sup>CD3<sup>+</sup>CD4<sup>+</sup>CD45RA<sup>-</sup> cells from LNMCS. (b) Expression of PD-1 in the CXCR5<sup>hi</sup> subset. (c) Enrichment for Bcl-6<sup>+</sup> (first group of panels) and PD-1<sup>+</sup> (second group of panels) cells in the CXCR5<sup>hi</sup> T cell subset from HIV-infected and uninfected LNs. Non-Tfh cells (CD45RA<sup>+</sup> and CD45RA<sup>-</sup>CXCR5<sup>-</sup>) are included for comparison of Bcl-6 and PD-1 staining. Representative plots are shown.

Supplementary Fig. 2 Gating strategies for T cell and B cell subsets from LNMCs

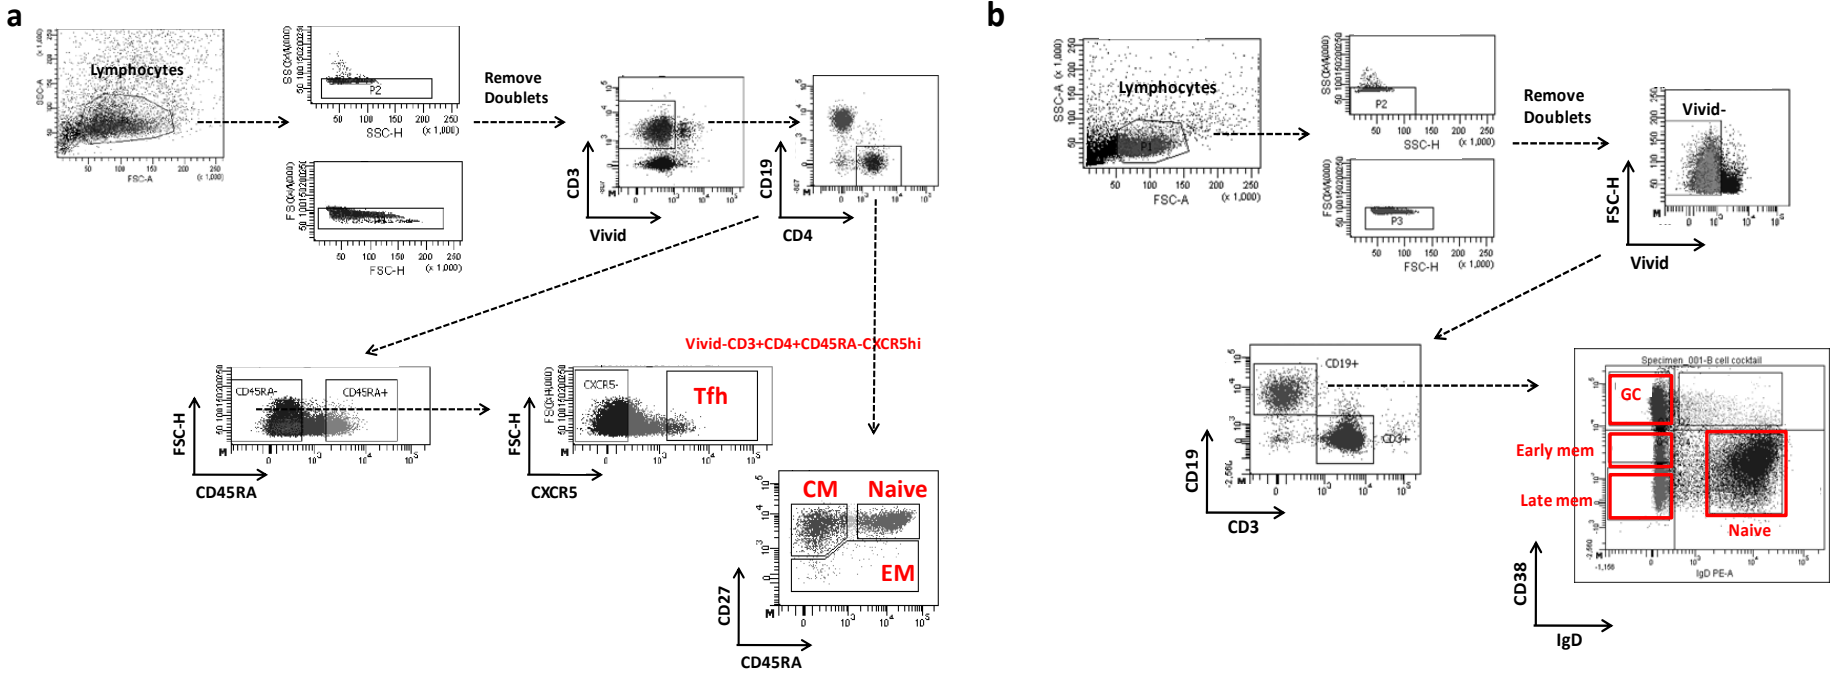

Cells were gated after removing doublets and dead cells. **(a)** T cell subsets were defined as: naïve ( $CD3^+CD4^+CD45RA^+CD27^+$ ), central memory ( $CD3^+CD4^+CD45RA^-CD27^+$ ), effector cells ( $CD3^+CD4^+CD45RA^-CD27^-$ ) and Tfh cells ( $CD3^+CD4^+CD45RA^-CXCR5^{hi}$ ). **(b)** B cell subsets were defined as: naïve ( $CD3^-CD19^+CD38^-IgD^+$ ), GC ( $CD3^-CD19^+CD38^{++}IgD^-$ ), early memory ( $CD3^-CD19^+CD38^+IgD^-$ ) and late memory ( $CD3^-CD19^+CD38^-IgD^-$ ).

Supplementary Fig. 3 Coculture of Tfh cells (CXCR5<sup>hi</sup>) with GC-enriched B cells from uninfected TMNCs leads to increased B cell help and antibody production

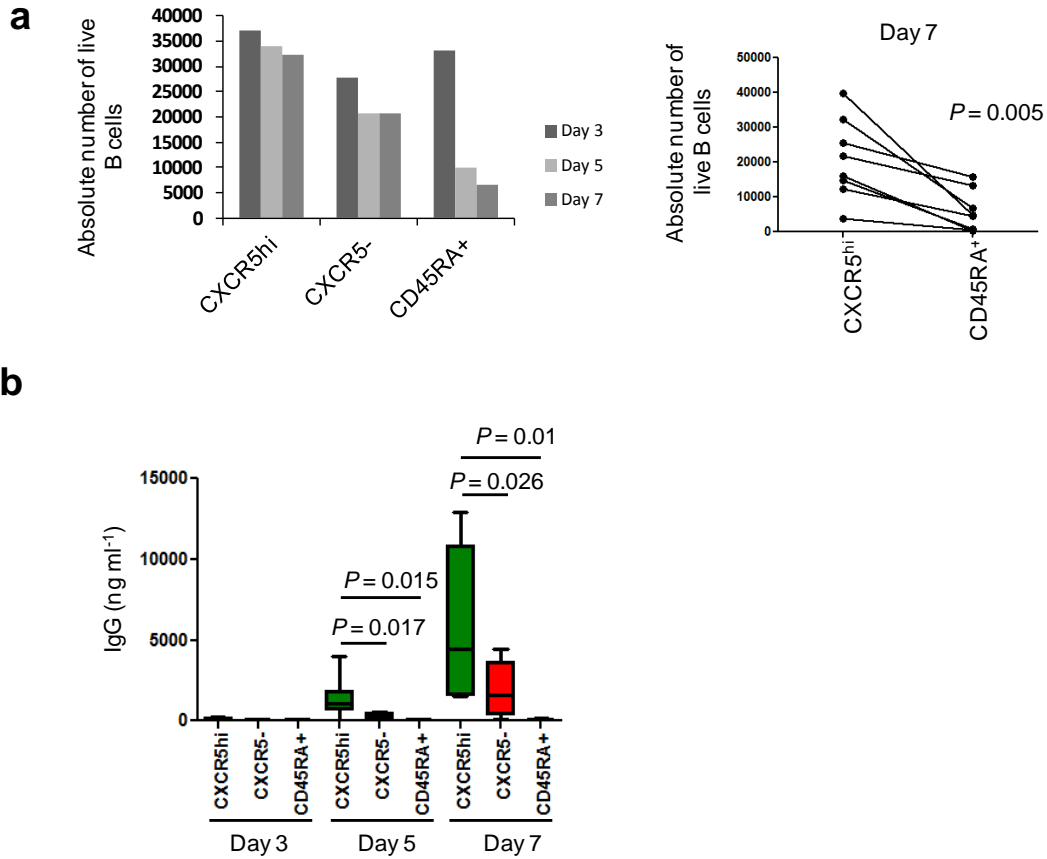

GC enriched B cells were cocultured with sorted autologous T cells ( $1 \times 10^5$ ) at a 1:1 ratio in the presence of  $100 \text{ ng ml}^{-1}$  of SEB. B cells were cocultured with either Tfh (CXCR5<sup>hi</sup>) or non-Tfh cells (CXCR5<sup>-</sup> and CD45RA<sup>+</sup>) for 3, 5 and 7 d. **(a)** Coculture of B cells with Tfh cells leads to a pronounced increase in the absolute number of live B cells at day 7 when compared to non-Tfh cells (CD4<sup>+</sup>CD45RA<sup>+</sup>) (n=8). The bar graph depicts a representative result for the absolute number of live B cells at different time points during the coculture. **(b)** Total IgG in the supernatant after coculture for 3, 5 and 7 days. (n=8).

**Supplementary Fig. 4 Cocultures of Tfh cells and GC-enriched B cells from SIV-infected macaques show reduced levels of immunoglobulin production**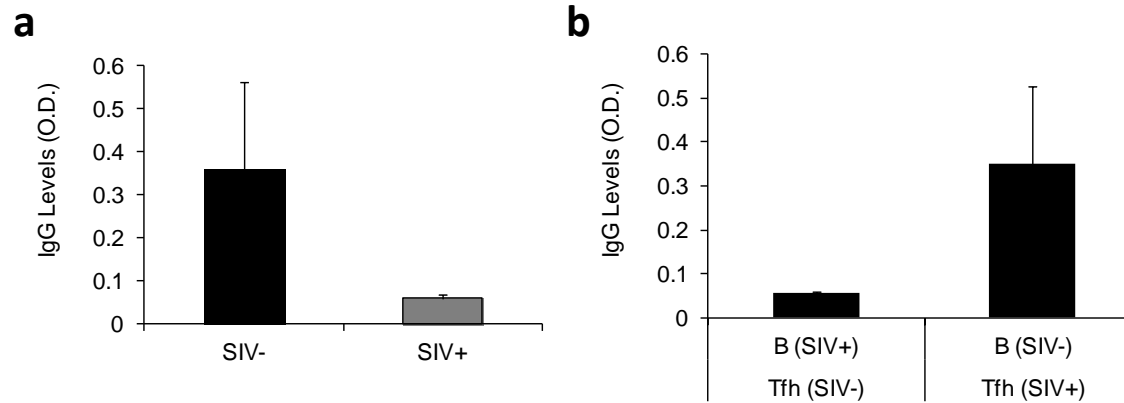

Tfh cells ( $CD3^+CD4^+CD45RA^-PD-1^{hi}$ ) and activated B cells ( $CD20^+CD21^-$ ) from age-matched LNs of SIV-infected or uninfected macaques were sorted and placed in coculture at equal numbers in the presence of SEB. Supernatants were harvested after 7 d to measure total immunoglobulin production. **(a)** Total levels of IgG in cocultures from uninfected and SIV-infected macaques ( $n = 2$ ). **(b)** Tfh cells and B cells from the same macaques before (SIV<sup>-</sup>) and after infection with SIV (SIV<sup>+</sup>) were mismatched and placed in coculture at equal numbers in the presence of SEB. After 7 d the supernatants were collected to measure the total levels of IgG ( $n = 2$ ).

Supplementary Fig. 5 Cocultures of Tfh cells and GC-enriched B cells from HIV-infected LNs show lower levels of IL-10

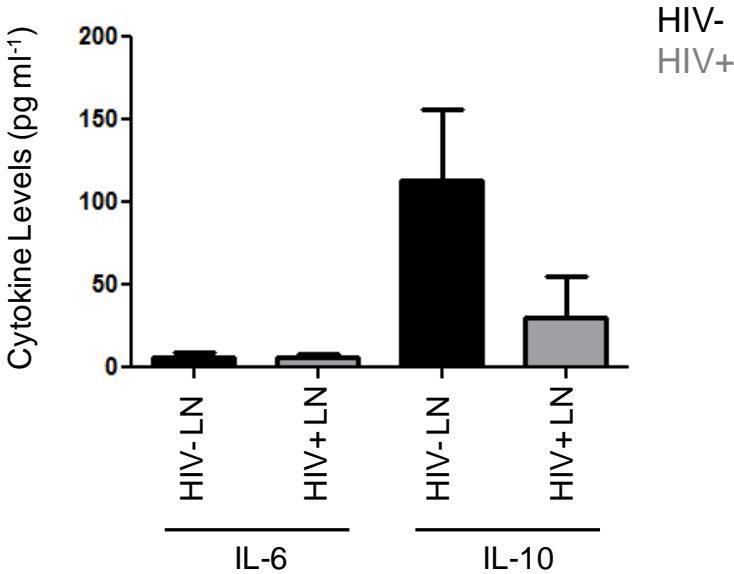

LNMCs from HIV<sup>-</sup> and HIV<sup>+</sup> subjects were sorted into Tfh and GC-enriched B cells. Cells were cocultured in the presence of SEB for 7 days and the supernatants were collected to analyse the levels of IL-6 and IL-10 by Cytometric Bead Assay (CBA) (n=4).

Supplementary Fig. 6 Expression levels of ICOS and CD40L in Tfh cells from LNs of HIV-infected and uninfected individuals

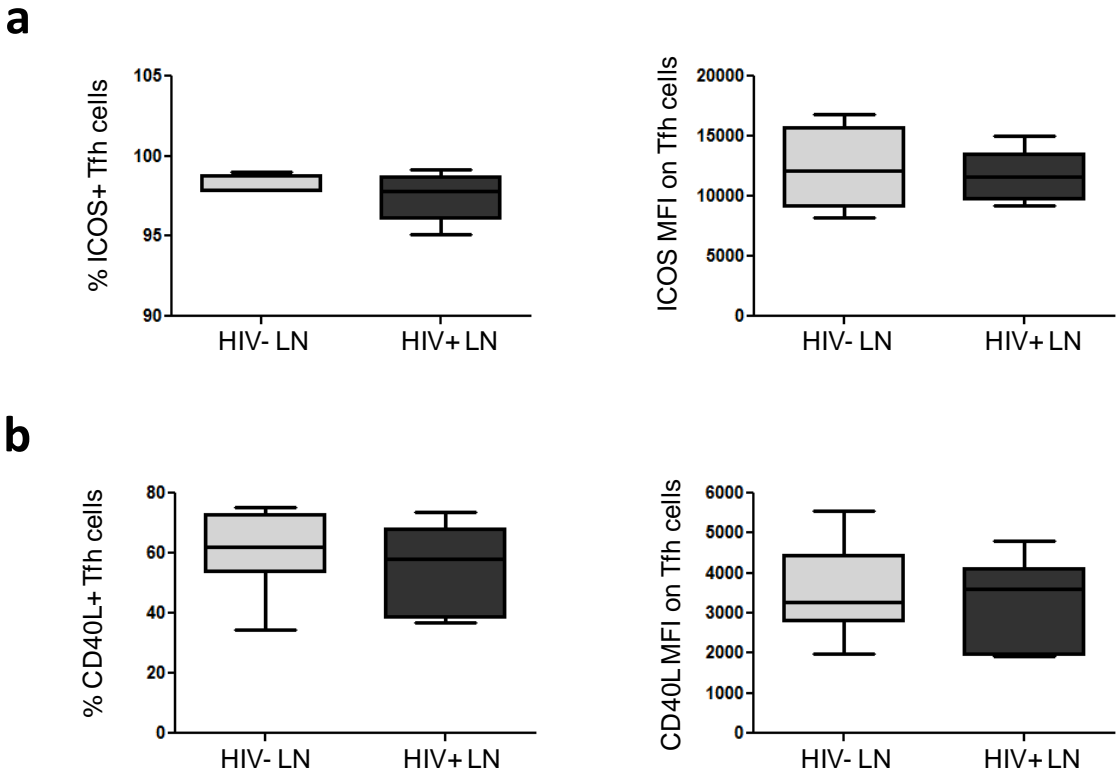

Tfh cells were defined as CD3<sup>+</sup>CD4<sup>+</sup>CD45RA<sup>-</sup>CXCR5<sup>hi</sup> cells. **(a)** Frequency of ICOS<sup>+</sup> Tfh cells and expression level for ICOS (MFI) on Tfh cells. **(b)** Frequency of CD40L<sup>+</sup> Tfh cells and expression level for CD40L (MFI) on Tfh cells (n ≥ 4 for both HIV<sup>-</sup> and HIV<sup>+</sup> LN samples).



Supplementary Fig. 7 Production of cytokines from Tfh cells as assessed by Luminex from uninfected and HIV-infected subjects

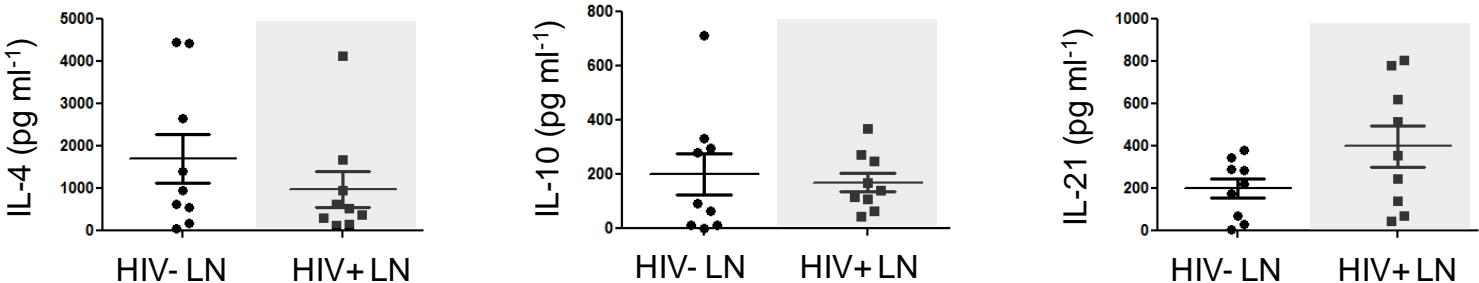

Tfh cells were sorted from LNMCs of HIV uninfected (n=9) and infected subjects (n=9). Sorted cells were then stimulated with phorbol myristate acetate (PMA 100 ng mL<sup>-1</sup>) and ionomycin (1 μg mL<sup>-1</sup>) in complete RPMI for 18 h at 37 °C. Supernatants were then collected and analyzed for the presence of cytokines (IL-4, IL-10 and IL-21). Plots depict the amount of cytokines produced (pg ml<sup>-1</sup>) from Tfh cells after stimulation.

Supplementary Fig. 8 Expression levels of CD95 on B cell subsets from LNs of HIV-infected and uninfected individuals

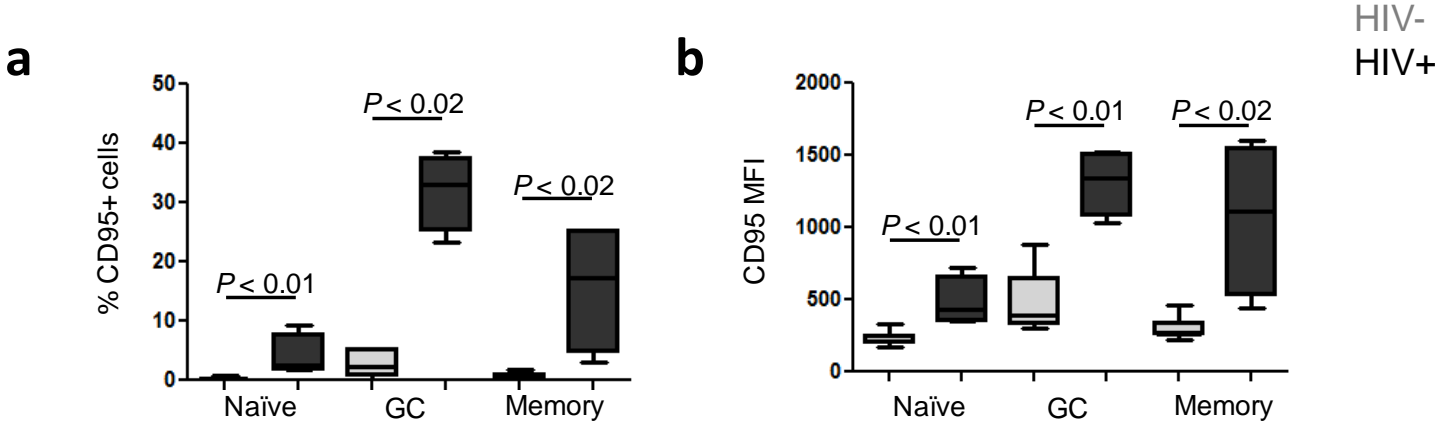

B cells subsets were defined as naïve (CD3<sup>-</sup>CD19<sup>+</sup>CD38<sup>-</sup>IgD<sup>+</sup>), GC (CD3<sup>-</sup>CD19<sup>+</sup>CD38<sup>++</sup>IgD<sup>-</sup>) and memory (CD3<sup>-</sup>CD19<sup>+</sup>CD38<sup>+/-</sup>IgD<sup>-</sup>). **(a)** Frequency and **(b)** level of CD95 expression on different B cell subsets as measured by flow cytometry analysis (n ≥ 4 for both HIV<sup>-</sup> and HIV<sup>+</sup> LN samples).

## Supplementary Fig. 9 Effect of polyclonal B cell activation on IgG production, viability and cytokine output

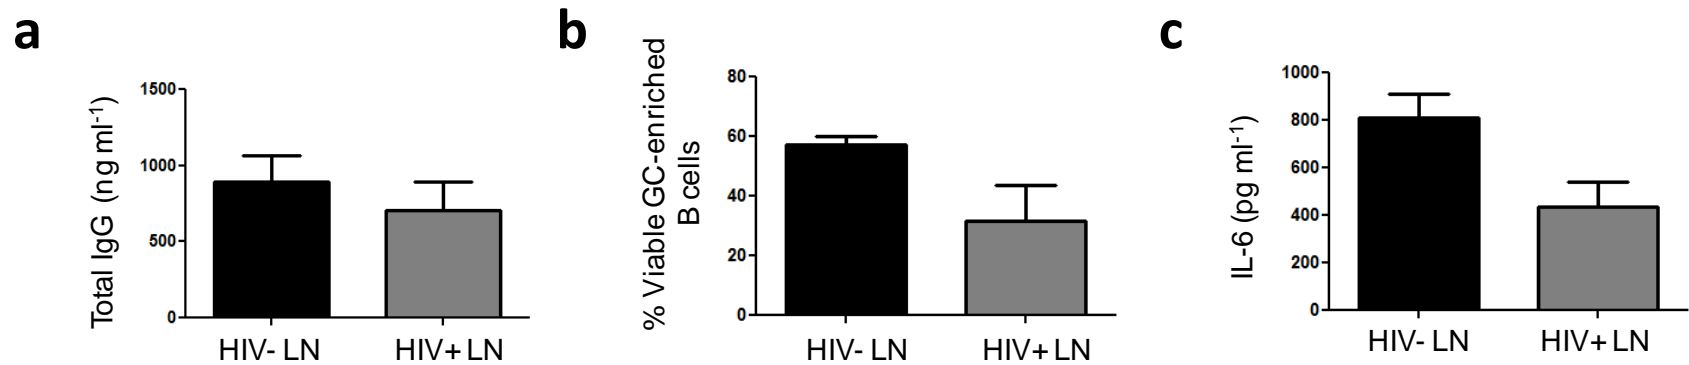

GC-enriched B cells from HIV-infected and uninfected LNs were sorted and placed in culture ( $1 \times 10^5$  cells) with  $2.5 \mu\text{g ml}^{-1}$  of CpG-B (ODN-2006) (InvivoGen) in complete media. After 4 d the supernatants were collected and the cells harvested for further analysis. **(a)** Total levels of IgG in the culture supernatant as measured by ELISA. **(b)** Frequency of viable GC-enriched B cells (defined as  $\text{Vivid}^{\text{+}}\text{Annexin-V}^{\text{-}}$ ) after 4 d in culture under polyclonal stimulation. **(c)** Total levels of IL-6 in the culture supernatants following polyclonal B cell stimulation as measured by CBA ( $\text{pg ml}^{-1}$ ) ( $n \geq 3$ ).

Supplementary Fig. 10 Effect of PD-1 triggering on cytokine production from Tfh cells

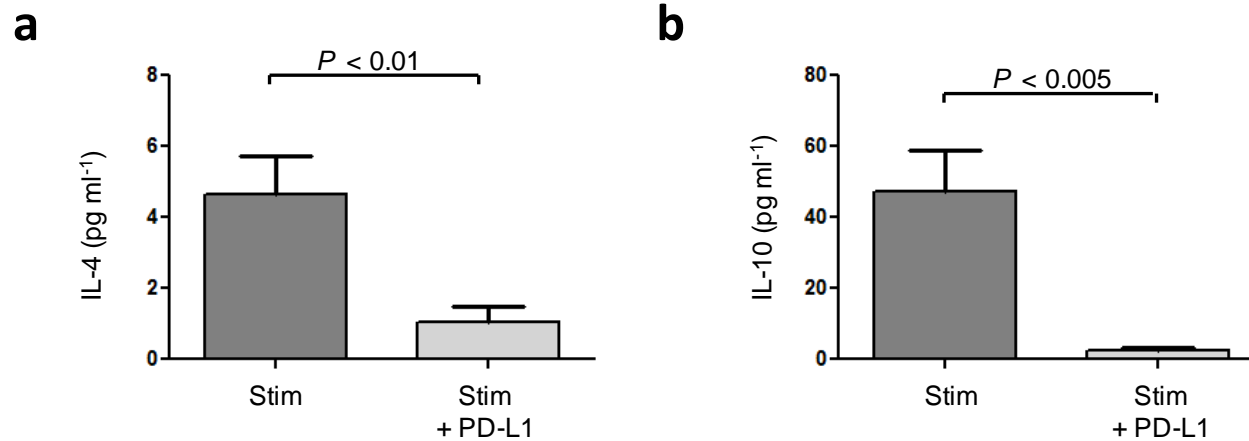

Tonsil mononuclear cells (TMNCs) from uninfected individuals were stained and sorted to highly purify Tfh cells. A total of  $2 \times 10^5$  cells were cultured for 3 d in the presence or absence of anti-CD3, anti-CD28 and isotype coated beads (Stim) or anti-CD3, anti-CD28 and PD-L1 coated beads (Stim + PD-L1). Supernatants were collected to analyze the levels of different cytokines by CBA. **(a)** Total levels of IL-4 and **(b)** IL-10 ( $\text{pg ml}^{-1}$ ) ( $n=8$ ).

Supplementary Fig. 11 Effect of PD-L1/L2 blocking antibodies on cocultures from Tfh and GC-enriched B cells from uninfected individuals

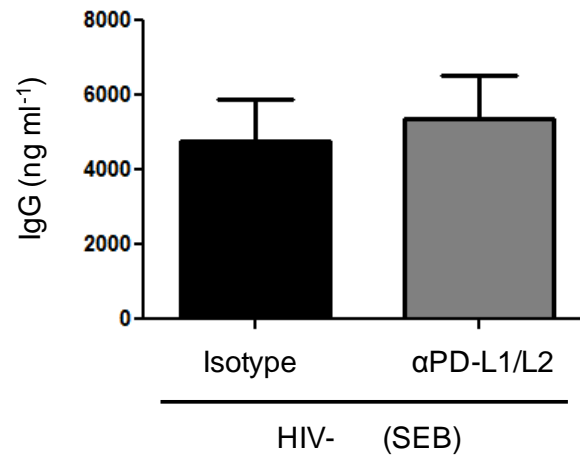

TMNCs from HIV<sup>-</sup> subjects were sorted into Tfh and GC-enriched B cells. B cells were treated with anti-PD-L1/L2 or isotype control antibodies (20 μg ml<sup>-1</sup>) for 20 min at 37 °C before addition of Tfh cells. Cells were then cocultured in the presence of SEB for 7 d. Supernatants were collected to measure the total level of IgG by ELISA (n=3).

Supplementary Fig. 12 Proposed model for the induction of Tfh functional impairment during HIV infection

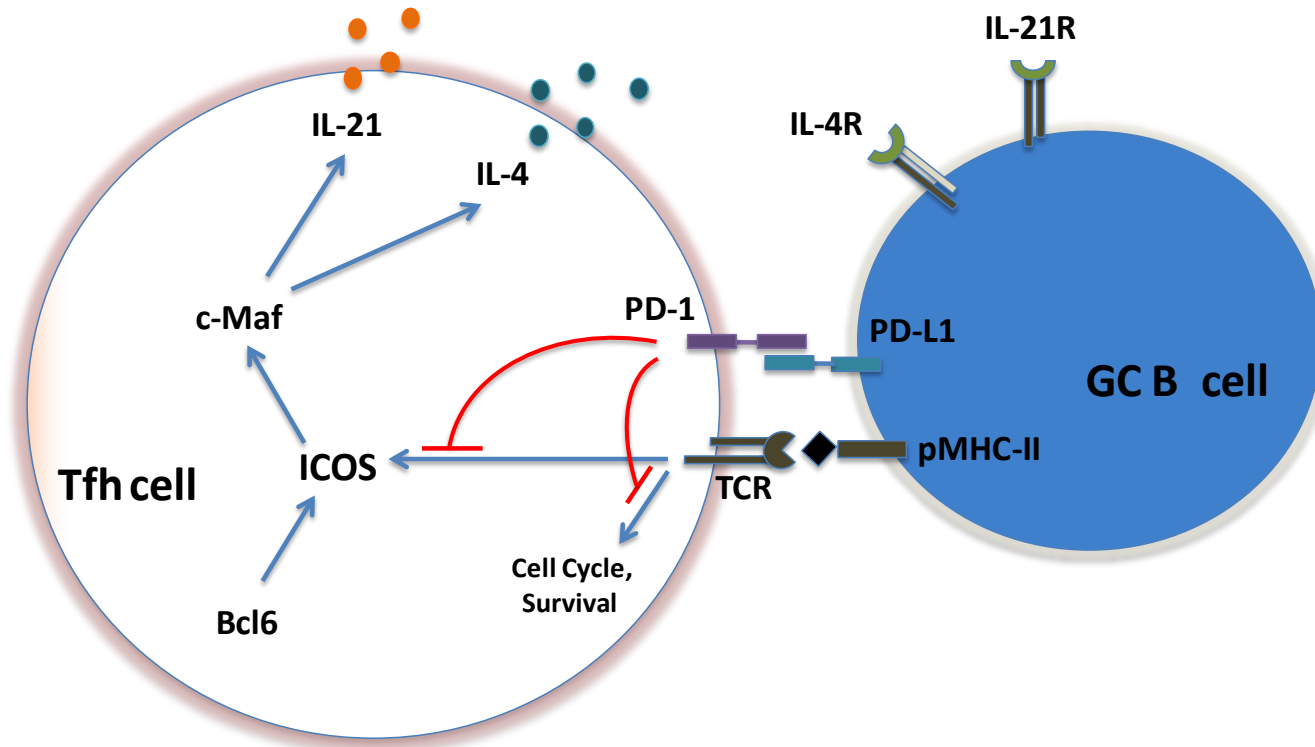

Interaction of Tfh cells with GC B cells in LNs from HIV<sup>+</sup> subjects can trigger PD-1 on Tfh cells. Engagement of PD-1 on Tfh cells results in the inhibition of cell proliferation, activation, survival and ICOS expression. This reduction in the levels of ICOS can in turn affect downstream transcription factors like c-Maf leading to reduced levels of IL-4 and IL-21 cytokine secretion which are critical in preventing GC B cell apoptosis and inducing B cell survival, proliferation and differentiation into antibody secreting plasma cells. PD-1 triggering on Tfh cells can therefore affect GC B cell responses and immunoglobulin production.
